# Supplementary material for: Effects of Nutritional Interventions on Cardiovascular Disease Health Outcomes in Aboriginal and Torres Strait Islander Australians: A Scoping Review
Source: MDPI journal article supplement (doi:10.3390/nu13114084), 2021-11-15
Supplement: s1 [file s1]

**Supplementary Table S1.** Medline Search Strategy.

| Search | Query                                                                                                                                                                                                                                                                                                                                                                  | Records<br>retrieved |
|--------|------------------------------------------------------------------------------------------------------------------------------------------------------------------------------------------------------------------------------------------------------------------------------------------------------------------------------------------------------------------------|----------------------|
| #1     | Nutrition*.tw. OR Nutrient*.tw. OR Macronutrient*.tw. OR Nutrition Assessment/ OR Nutrition Policy/ OR Nutrition Surveys/ OR Diet Surveys/ OR Diet Records/ OR Energy Intake/ OR Exp Diet/ OR diet*.tw. OR Eating/ OR eat*.tw. OR exp Food/ OR Food*.tw. OR Food Preferences/ OR exp Health Promotion/ OR Health Promotion.tw.                                         | 2420424              |
| #2     | Cardiovascular Disease/ OR Cardiovascular.tw. OR CVD.tw. OR Cardiac.tw. OR Cardiolg*.tw. OR exp Heart Diseases/ OR Heart.tw. OR Coronary*.tw. OR CHD.tw. OR Ischaemic.tw. OR IHD.tw. OR Myocardial.tw. OR exp Vascular Diseases/ OR Vascular.tw. OR Atherosclerosis.tw. OR Arter*.tw. OR Stroke.tw. OR Haemmorrhage.tw. OR exp Cardiovascular Physiological Phenomena/ | 4155409              |
| #3     | Aborigin*.tw OR Torres Strait Island*.tw OR Indigen*.tw. OR First People*.tw. OR First Nation*.tw.                                                                                                                                                                                                                                                                     | 49173                |
| #4     | Austral*.tw. OR Northern Territor*.tw. OR Victoria*.tw. Queensland* OR New South Wales.tw. OR Tasmania.tw.                                                                                                                                                                                                                                                             | 171563               |
| #5     | 1 AND 2 AND 3 AND 4                                                                                                                                                                                                                                                                                                                                                    | 124                  |
